# Supplementary material for: Dynamic Evolution of Humoral and T-Cell Specific Immune Response to COVID-19 mRNA Vaccine in Patients with Multiple Sclerosis Followed until the Booster Dose
Source: MDPI journal article supplement (doi:10.3390/ijms24108525), 2023-05-10
Supplement: s1 [file s1]

## Supplementary Table S1

**Supplementary Table S1. Univariable negative binomial regression models for demographic and clinical factors affecting the antibody (RBD) or T-cell (Spike) immune responses after the second mRNA vaccine dose (T1) or after the booster dose (T2)**

| PwMS vs. HCWs                      |      |           |                  |       |            |                  |
|------------------------------------|------|-----------|------------------|-------|------------|------------------|
| RBD                                | T1   |           |                  | T2    |            |                  |
|                                    | IRR  | 95%CI     | p                | IRR   | 95%CI      | p                |
| HCWs                               | 1.00 |           |                  | 1.00  |            |                  |
| IFN- $\beta$                       | 0.77 | 0.52-1.16 | 0.209            | 1.49  | 0.73-3.05  | 0.270            |
| Cladribine                         | 0.49 | 0.30-0.80 | <b>0.004</b>     | 0.84  | 0.31-2.24  | 0.723            |
| Fingolimod                         | 0.14 | 0.10-0.21 | <b>&lt;0.001</b> | 0.07  | 0.04-0.13  | <b>&lt;0.001</b> |
| Ocrelizumab                        | 0.02 | 0.02-0.04 | <b>&lt;0.001</b> | 0.07  | 0.04-0.14  | <b>&lt;0.001</b> |
| Weeks elapsed from the vaccination | 0.80 | 0.74-0.87 | <b>&lt;0.001</b> | 0.79  | 0.65-0.96  | <b>0.015</b>     |
| Age                                | 0.99 | 0.97-1.01 | 0.163            | 0.99  | 0.97-1.02  | 0.456            |
| Male                               | 0.74 | 0.48-1.13 | 0.160            | 0.96  | 0.51-1.81  | 0.904            |
| Within PwMS cohort                 |      |           |                  |       |            |                  |
| RBD                                | T1   |           |                  | T2    |            |                  |
|                                    | IRR  | 95%CI     | p                | IRR   | 95%CI      | p                |
| IFN- $\beta$                       | 1.00 |           |                  | 1.00  |            |                  |
| Cladribine                         | 0.64 | 0.31-1.32 | 0.223            | 0.56  | 0.13-2.37  | 0.431            |
| Fingolimod                         | 0.18 | 0.10-0.34 | <b>&lt;0.001</b> | 0.05  | 0.02-0.14  | <b>&lt;0.001</b> |
| Ocrelizumab                        | 0.03 | 0.02-0.06 | <b>&lt;0.001</b> | 0.05  | 0.02-0.15  | <b>&lt;0.001</b> |
| Weeks elapsed from the vaccination | 1.26 | 0.74-2.15 | 0.384            | 0.91  | 0.60-1.39  | 0.676            |
| Age                                | 0.99 | 0.97-1.02 | 0.682            | 0.98  | 0.95-1.02  | 0.389            |
| Male                               | 0.69 | 0.34-1.37 | 0.283            | 0.98  | 0.35-2.76  | 0.967            |
| BMI                                | 0.98 | 0.90-1.07 | 0.683            | 1.02  | 0.90-1.16  | 0.772            |
| Treatment duration                 | 1.09 | 1.03-1.15 | <b>0.005</b>     | 1.09  | 1.00-1.19  | 0.053            |
| Disease duration                   | 1.01 | 0.97-1.04 | 0.685            | 1.01  | 0.96-1.06  | 0.755            |
| Lymphocytes                        | 1.35 | 0.73-2.53 | 0.341            | 2.39  | 0.81-7.03  | 0.115            |
| EDSS                               | 0.75 | 0.66-0.87 | <b>&lt;0.001</b> | 0.75  | 0.60-0.94  | <b>0.014</b>     |
| PwMS vs. HCWs                      |      |           |                  |       |            |                  |
| Spike                              | T1   |           |                  | T2    |            |                  |
|                                    | IRR  | 95%CI     | p                | IRR   | 95%CI      | p                |
| HCWs                               | 1.00 |           |                  | 1.00  |            |                  |
| IFN- $\beta$                       | 0.50 | 0.31-0.82 | <b>0.006</b>     | 0.55  | 0.27-1.12  | 0.098            |
| Cladribine                         | 0.26 | 0.14-0.47 | <b>&lt;0.001</b> | 0.12  | 0.05-0.30  | <b>&lt;0.001</b> |
| Fingolimod                         | 0.01 | 0.00-0.01 | <b>&lt;0.001</b> | 0.003 | 0.001-0.01 | <b>&lt;0.001</b> |
| Ocrelizumab                        | 0.44 | 0.27-0.71 | <b>0.001</b>     | 0.48  | 0.24-0.96  | <b>0.037</b>     |
| Weeks elapsed from the vaccination | 0.76 | 0.70-0.84 | <b>&lt;0.001</b> | 0.84  | 0.68-1.04  | 0.103            |
| Age                                | 0.97 | 0.95-0.99 | <b>0.013</b>     | 0.97  | 0.94-1.01  | 0.154            |
| Male                               | 1.16 | 0.71-1.90 | 0.545            | 0.65  | 0.29-1.45  | 0.292            |
| Within PwMS cohort                 |      |           |                  |       |            |                  |
| Spike                              | T1   |           |                  | T2    |            |                  |
|                                    | IRR  | 95%CI     | p                | IRR   | 95%CI      | p                |
| IFN- $\beta$                       | 1.00 |           |                  | 1.00  |            |                  |
| Cladribine                         | 0.52 | 0.25-1.10 | 0.089            | 0.21  | 0.07-0.60  | <b>0.004</b>     |
| Fingolimod                         | 0.01 | 0.01-0.02 | <b>&lt;0.001</b> | 0.01  | 0.003-0.01 | <b>&lt;0.001</b> |
| Ocrelizumab                        | 0.87 | 0.46-1.67 | 0.688            | 0.87  | 0.39-1.95  | 0.741            |
| Weeks elapsed from the vaccination | 1.08 | 0.60-1.97 | 0.783            | 1.06  | 0.77-1.44  | 0.724            |
| Age                                | 0.98 | 0.95-1.01 | 0.294            | 0.98  | 0.94-1.02  | 0.236            |
| Male                               | 0.99 | 0.47-2.08 | 0.986            | 1.18  | 0.44-3.20  | 0.743            |
| BMI                                | 1.00 | 0.94-1.07 | 0.985            | 1.02  | 0.93-1.11  | 0.696            |
| Treatment duration                 | 1.01 | 0.95-1.07 | 0.711            | 1.02  | 0.95-1.09  | 0.644            |
| Disease duration                   | 0.98 | 0.95-1.02 | 0.335            | 0.98  | 0.93-1.03  | 0.453            |
| Lymphocytes                        | 2.83 | 1.33-6.05 | <b>0.007</b>     | 11.70 | 3.80-36.5  | <b>&lt;0.001</b> |
| EDSS                               | 0.96 | 0.83-1.11 | 0.609            | 0.85  | 0.69-1.05  | 0.135            |

**Footnotes:** IRR: incidence rate ratio; PwMS: patients with multiple sclerosis; HCWs: health care workers; CI: confidence interval; RBD: receptor-binding domain; IFN, interferon; BMI: body mass index; EDSS: Expanded Disability Status Scale. In bold are reported the significant values.
